1 *In vitro* evaluation of the response of human tendon-derived stromal cells to a novel  
2 electrospun suture for tendon repair

3  
4 Nezhentsev A<sup>1\*</sup>, Abhari RE<sup>1\*</sup>, Baldwin MJ<sup>1</sup>, Mimpfen JY<sup>1</sup>, Augustyniak E<sup>1</sup>, Isaacs M<sup>2,3</sup>,  
5 Mouthuy P-A<sup>1</sup>, Carr AJ<sup>1</sup>, Snelling SJB<sup>1</sup>

6  
7 \*joint first authors

8  
9 <sup>1</sup>Nuffield Department of Orthopaedics, Rheumatology, and Musculoskeletal Sciences,  
10 University of Oxford, Oxford, UK

11 <sup>2</sup>Department of Chemistry, University College London, 20 Gordon St, Bloomsbury, London  
12 WC1H 0AJ

13 <sup>3</sup>HarwellXPS, Research Complex at Harwell, Rutherford Appleton Laboratories, Harwell  
14 Campus, OX11 0DE

15

16

17 **Corresponding author**

18 Roxanna Abhari, DPhil

19 NDORMS, University of Oxford

20 Botnar Research Centre

21 Old Road, Headington, Oxford OX37LD, United Kingdom

22 roxanna.abhari@medschool.ox.ac.uk

23

24

25 **Abstract**

26 Recurrent tears after surgical tendon repair remain common. Repair failures can be partly  
27 attributed to the use of sutures not designed for the tendon cellular niche nor for the promotion  
28 of repair processes. Synthetic electrospun materials can mechanically support the tendon whilst  
29 providing topographical cues that regulate cell behaviour. Here, a novel electrospun suture  
30 made from twisted polydioxanone (PDO) polymer filaments is compared to PDS II, a  
31 clinically-used PDO suture currently utilised in tendon repair. We evaluated the ability of these  
32 sutures to support the attachment and proliferation of human tendon-derived stromal cells using  
33 PrestoBlue and Scanning Electron Microscopy. Suture surface chemistry was analysed using  
34 X-ray Photoelectron Spectroscopy. Bulk RNA-Seq interrogated the transcriptional response of  
35 primary tendon-derived stromal cells to sutures after 14 days. Electrospun suture showed  
36 increased initial cell attachment and a stronger transcriptional response compared to PDS II,  
37 with relative enrichment of pathways including mTorc1 signalling and depletion of epithelial  
38 mesenchymal transition. Neither suture induced transcriptional upregulation of inflammatory  
39 pathways compared to baseline. Twisted electrospun sutures therefore show promise in  
40 improving outcomes in surgical tendon repair by allowing increased cell attachment whilst  
41 maintaining an appropriate tissue response.

42 **Keywords**

43 Electrospinning; Electrospun suture; PDS II; Polydioxanone; Tendon repair; Tissue  
44 engineering

45

46

## 47 **Introduction**

48 Tendon injuries are common and cause pain and reduced quality of life for patients. Rotator  
49 cuff tendon tears alone affect around 50% of those over 66 years of age<sup>1</sup> and many of these  
50 patients require surgical repair<sup>2</sup>. However, despite exploration of different suture methods,  
51 surgical tendon repairs have poor outcomes due to suture pull-through or tissue re-tears, with  
52 40% of rotator cuff repairs failing within one year<sup>3</sup>. This failure to successfully repair torn  
53 tendons causes long-term disability and represents a significant socioeconomic cost<sup>4</sup>.

54 Suture-based re-joining of tendon ends is the current gold standard surgical treatment for  
55 tendon injuries, but currently used sutures have been repurposed from other anatomical sites  
56 and have not been designed for the tendon niche. Clinically-used sutures are manufactured  
57 from synthetic polymers with high tensile strength to provide mechanical augmentation.  
58 However, their topographical characteristics (including fibre diameter) are dissimilar to native  
59 tendon, which is composed of multiple aligned small diameter collagen fibres. Furthermore,  
60 cells do not integrate with the material<sup>5</sup>, demonstrated by acellular zones forming around  
61 sutured sites<sup>6,7</sup>. This lack of infiltration and integration likely contributes to poor tendon healing  
62 at the suture-tissue interface. In addition, immune and stromal cells drive a foreign body  
63 response to implantable materials including sutures. This can result in chronic inflammation,  
64 which can hamper endogenous repair and lead to tissue failure<sup>8</sup>.

65 The use of sutures that enable cellular attachment and proliferation, and that do not raise a  
66 chronic inflammatory response may improve the efficacy of tendon repair<sup>5</sup>. Electrospun  
67 materials show particular promise and can be produced from synthetic and clinically-approved  
68 materials, including polydioxanone (PDO), which is an absorbable polymer used to produce  
69 PDS II sutures currently deployed in tendon repair. The high surface area and porosity of  
70 electrospun materials together with the ability to manufacture them with fibre diameters similar  
71 to the collagen fibres in native tendons provides biomimicry not afforded by conventional

72 sutures<sup>9</sup>. Electrospun materials also promote infiltration and proliferation of stromal cells,  
73 including those derived from tendon, and induce expression of tenogenic markers<sup>10-12</sup>. Surface  
74 chemistry, fibre diameter, and alignment of materials can tune cell behaviour and this can be  
75 exploited to drive repair. However, when manipulating the mechanical and topographical  
76 properties of a clinically-approved material it is important to define the cellular response to its  
77 specific material properties.

78

79 Twisting and braiding electrospun strands into bundles can direct cells to attach and grow in a  
80 parallel network, similar to the macroscopic architecture of tendon<sup>14,15</sup>. The morphology and  
81 proliferation of tendon-derived stromal cells cultured on electrospun materials have been  
82 previously described, but only a small number of selected genes was assessed in tendon-derived  
83 stromal cell gene expression analyses<sup>14,16-18</sup> and response<sup>7,13</sup>. Previous work has also described  
84 the twisting of electrospun PDO fibres into prototype multifilament yarns that have similar a  
85 tensile strength to currently used sutures and that resemble the hierarchical structure of  
86 tendons<sup>13</sup>. Following *in vivo* tendon injury in a rat and sheep model, prototype electrospun  
87 sutures supported cellular infiltration with a minimal inflammatory response. Understanding  
88 how tendon cells interact with the material *in vitro* can therefore help predict how the  
89 electrospun suture will interact and integrate with tendon *in vivo*. The effect of twisted  
90 electrospun sutures on the global transcriptional profile of tendon-derived stromal cells *in vitro*  
91 or *in vivo* is not well explored. It therefore remains necessary to understand the response of  
92 tendon cells to sutures developed for their surgical repair, compared to sutures currently used  
93 in surgery.

94

95 The overarching aim of this *in vitro* study is to assess the potential of twisted electrospun PDO  
96 sutures in tendon repair. This builds on our previously published work<sup>13,19</sup> and uses a modified

97 electrospun suture that ensures uniformity of fibre diameter, and a high tensile strength and  
98 hierarchical structure that has potential to both mechanically and biologically support repair.  
99 We hypothesized that a twisted electrospun suture would promote tendon-derived stromal cell  
100 attachment and proliferation and induce a pro-reparative gene expression profile.

101

## 102 **Materials and Methods**

### 103 Suture preparation

104 Electrospun sutures were fabricated according to the protocol described in supplementary  
105 material 1. Four 2 cm pieces of electrospun suture and PDS II (Ethicon Inc.) were then melted  
106 together at both ends by holding near a 200°C hot wire (Proxxon, Axminster, UK). This formed  
107 mats that could be transferred between tissue culture wells without disrupting cells. The mats  
108 were sterilised by submerging in 70% ethanol for 2 hours, and dried overnight. The sutures  
109 were washed twice in PBS and soaked for 2 hours in D10 medium (DMEM-F12 (Thermo  
110 Fisher Scientific) supplemented with 10% Foetal Calf Serum (Labtech, Melbourn, UK) and  
111 1% Penicillin-Streptomycin (Thermo Fisher Scientific)).

112

### 113 Tendon-derived stromal cell seeding

114 Waste healthy mid-body hamstring tendon tissue was collected from four male patients aged  
115 20-43 (SD +/- 9.4 yr), BMI 21.46-27.76 (SD +/- 2.77 kg/m<sup>2</sup>), during Anterior Cruciate  
116 Ligament reconstruction. Tendon-derived stromal cells were extracted and expanded from  
117 tendon explants as previously described<sup>18</sup> (S2). 50,000 tendon-derived stromal cells (passage  
118 3) were seeded dropwise onto the suture mats, or directly into empty wells for Tissue Culture  
119 Plastic (TCP) controls (3 technical repeats for each patient). TCP controls were used later to  
120 determine whether changes in gene expression were caused by cell-instructive cues provided  
121 by the suture materials. After 4 hours, mats were transferred into a new 12-well plate.

122

### 123 Scanning Electron Microscopy

124 Suture pieces were prepared for imaging (S3). The Evo LS15 Variable Pressure Scanning  
125 Electron Microscope (Carl Zeiss AG, Oberkochen, Germany) was used to capture images.  
126 Images were taken at 200X magnification to visualise suture structure, and at 2000X  
127 magnification to visualise attached cells.

128

### 129 Cell Viability

130 Measurements of cell viability were performed by incubating cells seeded on TCP and sutures  
131 in 10% PrestoBlue for 2 hours on days 1, 4, 7, 11 and 13 after seeding (S4). Fluorescence was  
132 measured using a FLUOstar Omega Microplate Reader (BMG Labtech, Aylesbury, UK) at 544  
133 nm excitation and 590 nm emission.

134

### 135 RNA Sequencing

136 RNA was extracted (S5) from hamstring tendon-derived stromal cells (n=4 patients) after 14  
137 days culture on sutures and TCP after 14 days culture and at baseline (time of seeding on  
138 sutures and TCP).<sup>20</sup>

139 Bulk RNA-Seq interrogated the tendon-derived stromal cells' transcriptomic response to the  
140 sutures. Libraries were created using a NEBNext Ultra II Directional RNA Library Prep Kit  
141 for Illumina (New England Biolabs, Ipswich, MA, USA) and sequencing performed on an  
142 Illumina NextSeq 500 using a NextSeq High Output Kit. A quality control (QC) report was  
143 collated using the MultiQC tool (v1.7)<sup>21</sup>. Due to low percentage alignment with the reference  
144 genome, one PDS II sample did not pass QC and was excluded from analysis. Principal  
145 Component Analysis plots extracted the components responsible for most of the dataset  
146 variance (S6). The DESeq2 package<sup>22</sup> was utilised to undertake pairwise comparisons of gene

147 expression at 14 days of culture . Gene-set enrichment analyses was performed using the cluster  
148 Profiler package<sup>23</sup>, and data visualised using Enhanced Volcano and ggplot2.

149

### 150 X-ray Photoelectron Spectroscopy

151 To assess the surface chemistry of sutures, sutures were flattened into sheets by a hydraulic  
152 press (Specac, Orpington, UK) set to 8 tonnes for 30 seconds, and mounted onto a glass slide  
153 using double-sided carbon tape. X-ray Photoelectron Spectroscopy (XPS) measurements were  
154 made using an AXIS Supra (KRATOS Analytical, Stretford, UK) (S8).

155

### 156 Data Analysis

157 GraphPad Prism 8 (GraphPad Software Inc., San Diego, CA, USA) was used for statistical  
158 analysis of XPS and cell viability data. The D'Agostino-Pearson test was used to test the  
159 normality of the biological replicates. Unpaired t-tests were used to determine whether there  
160 was a difference in between the two suture samples. The Holm-Sidak method was used to  
161 correct for multiple comparisons. Results were deemed statistically significant when  $p < 0.05$ ,  
162 and statistical significance is displayed in shorthand as \* $p < 0.05$ , \*\* $p < 0.01$ , \*\*\* $p < 0.001$ , and  
163 \*\*\*\* $p < 0.0001$ . R and R packages (S7) were used to analyse gene expression data.

164

## 165 **Results**

### 166 Initial cell attachment was higher on twisted electrospun suture than PDS II

167 To compare the ability of electrospun and PDS II sutures to support attachment and  
168 proliferation of tendon-derived stromal cells, cells were cultured for 13 days on each surface  
169 and assessed using SEM imaging and PrestoBlue viability assays. SEM images showed cells  
170 attaching to and proliferating on both sutures, with cell coverage increasing throughout the  
171 duration of the experiment (Figure 1 A-H). PrestoBlue viability analysis was used to give a

172 surrogate measure of relative cell number over 13 days of tissue culture. The number of viable  
173 cells was higher on the electrospun suture compared to PDS II on day 1 ( $p < 0.001$ ) (Figure 1I),  
174 indicating higher initial stromal cell attachment. The number of cells present on electrospun  
175 sutures remained higher throughout the culture period, with the electrospun suture containing  
176 4 times as many cells than PDS II by day 13 ( $p < 0.0001$ ) (Figure 1I). When cell number was  
177 baseline-corrected relative to day 1, there were no differences in proliferation rates on each  
178 suture material (Figure 1J).

179

180 Electrospun suture elicits a stronger transcriptional response in tendon-derived stromal cells  
181 than PDS II

182 The transcriptome of tendon-derived stromal cells at baseline and cultured for 14 days on the  
183 sutures or TCP was evaluated using bulk RNA-Seq. Differentially expressed genes ( $\text{Padj} < 0.05$ ,  
184  $\text{LFC} \geq 1$ ) of cells cultured for 13 days on electrospun sutures, PDS II, and TCP compared to  
185 baseline are shown using volcano plots (Figure 2). After 14 days' culture, 1849, 667 and 61  
186 genes were differentially expressed on electrospun sutures, PDS II and TCP, respectively, when  
187 compared to baseline (Figure 2A-C). When directly comparing the transcriptome of cells  
188 cultured on electrospun and PDS II sutures on day 13, 122 genes were differentially expressed  
189 (Figure 2D).

190

191 Hallmark gene-set enrichment analysis was used to analyse if the differentially expressed genes  
192 significantly contributed to changes in 50 well-defined biological processes (Figure 3). While  
193 both sutures upregulated expression of gene-sets associated with cell cycle progression (MYC-  
194 and E2F- Targets) and DNA repair, the electrospun suture lead to more pronounced changes  
195 than PDS II. Additional differences between the two sutures could be seen in pathways related  
196 to inflammation (IL6-JAK-STAT3 Signalling and  $\text{TNF}\alpha$  Signalling via  $\text{NF-}\kappa\text{B}$ ) and hypoxia,



197 which were significantly downregulated by PDS II, which is similar to TCP but not the  
198 electrospun suture. When directly comparing the two sutures, 18 gene-sets were differentially  
199 regulated (Figure 3.B) including enrichment for Mtorc 1 signalling and Myc targets, and a  
200 relative reduction in the genesets belonging to the epithelial to mesenchymal transition pathway  
201 in cells cultured on electrospun suture compared to PDS II sutures. Gene ontology gene-set  
202 enrichment analysis found that differentially regulated genes between electrospun and PDS II  
203 sutures contributed to changes in biological adhesion, cellular component morphogenesis, and  
204 (collagen containing) extracellular matrix.

205

#### 206 Local surface chemistry of electrospun sutures and PDS II is similar

207 While electrospun and PDS II sutures are both made of PDO, these results show that tendon-  
208 derived stromal cells cultured on these sutures have significant differences in attachment and  
209 transcriptional response. Differences in chemical functional groups at the suture surface may  
210 mediate altered serum protein attachment, leading to the observed differences in tendon-  
211 derived stromal cell response electrospun and PDS II sutures<sup>24</sup>. To establish whether  
212 differences in the structure or manufacturing processes of the sutures had resulted in differences  
213 in surface chemistry, XPS analysis was used to determine the functional groups present on the  
214 surface of the suture. Both sutures are made from PDO, containing C-C/C-H, C-O and C=O  
215 functional groups, and these groups were all present on the surface of both sutures. Although  
216 there were subtle alterations in the abundance of C-O groups on the surface of electrospun  
217 compared to PDS II sutures this did not reach statistical significance (Figure 4), suggesting that  
218 differences in structure and manufacturing processes do not strongly affect suture surface  
219 chemistry.

## 220 **Discussion**

221 Tendon disease is common and surgical repair of torn tendons is prone to failure. Electrospun  
222 materials that mimic the hierarchical structure of tendon tissues could be used to support  
223 endogenous tissue repair. This work aimed to investigate the potential of a twisted electrospun  
224 suture in the surgical repair of tendon tears. Tendon-derived stromal cells showed increased  
225 attachment to electrospun sutures. We also demonstrated that electrospun sutures induced a  
226 distinct and stronger tendon-derived stromal cell transcriptomic response when compared to  
227 PDS II sutures.

228 Tendon-derived stromal cells attached to and proliferated on both electrospun sutures and PDS  
229 II, but initial cell attachment to electrospun sutures was significantly higher. There were no  
230 statistically significant differences in the sutures' surface chemistry, which would have meant  
231 similar serum protein attachment and subsequent cell attachment. However, it is likely that the  
232 greater cell attachment to electrospun suture was caused by its highly-textured surface and high  
233 surface area, compared to the smoother surface of PDS II. Indeed, electrospun sutures are  
234 composed of multiple twisted fibres with diameters that not only resemble collagen fibrils but  
235 have also been shown to promote fibroblast adhesion and infiltration<sup>25,26</sup>. The attachment of  
236 greater cell numbers could potentially lead to relative increases in ECM production, possibly  
237 accelerating tendon repair. Electrospun sutures have previously been shown to promote cellular  
238 infiltration *in vivo* and improved tissue integration which could reduce the rate of suture pull  
239 through<sup>7</sup>.

240 To investigate the sutures' effects on gene expression, RNA-Seq was performed on healthy  
241 tendon-derived stromal cells after 14 days' culture on TCP, electrospun and PDS II sutures.  
242 Ideally, sutures should stimulate a gene expression profile indicative of wound healing,  
243 upregulating pathways associated with cell proliferation and repair, without uncontrolled or  
244 sustained upregulation of fibrotic or inflammatory pathways<sup>8 27</sup>. Tendon-derived stromal cells

245 cultured on electrospun suture and PDS II both upregulated gene-sets associated with the cell  
246 cycle, indicating enhanced cellular proliferation, and upregulated mTORC1 signalling,  
247 indicating upregulation of pathways relating to wound healing, protein synthesis and tendon  
248 maturation<sup>28</sup>. These results were more pronounced for electrospun sutures. PDS II is regarded  
249 as an immune-compatible suture, based on favourable cellular inflammatory responses in  
250 rodent models of soft tissue repair, and therefore the similarities in response to PDS II and  
251 electrospun sutures supports exploration of electrospun sutures for tendon repair<sup>29-31</sup>. Tendon-  
252 derived stromal cells cultured on electrospun sutures also downregulated epithelial  
253 mesenchymal transition and extracellular matrix genesets, and upregulated NF-kB genesets  
254 when compared to PDS II. This suggests they induce a wound healing response that is not  
255 strongly fibrotic, potentially minimising formation of weak scar tissue which may lead to  
256 tendon repair failure<sup>32</sup>. Surface chemistry, porosity and topography are all able to regulate  
257 fibroblast behaviour and may have contributed to the differences in transcriptional profile of  
258 tendon-derived stromal cells cultured on PDS II and electrospun sutures. Few genes were  
259 differentially expressed after 14 days of culture on TCP, indicating that PDS II and electrospun  
260 sutures provided cell-instructive cues and that gene expression changes on these sutures were  
261 not due to temporal changes due to prolonged culture alone. Although PDS II is considered  
262 biocompatible, it was not designed for repairing damaged tendon tissue. By allowing increased  
263 tendon-derived stromal cell attachment whilst not inducing a fibrotic transcriptional response,  
264 electrospun sutures could therefore improve the outcomes of surgical tendon repair when  
265 compared to currently used sutures.

266

## 267 **Perspectives**

### 268 Future directions and limitations

269 This work has a number of limitations. Tendon-derived stromal cells from diseased tendons  
270 would better recapitulate the response of pathological tissue to the materials. Tissue from  
271 massive rotator cuff tears (>5cm) are in greatest need of improved augmentation materials, as  
272 they have the highest rate of failure<sup>33</sup>. Finally, during surgical repair, the damaged tendon is  
273 rapidly infiltrated by macrophages<sup>34</sup>, which could alter the cellular environment that  
274 biomaterials are exposed to<sup>35,36</sup>. Tendon-derived stromal cells co-cultured with monocyte-  
275 derived macrophages would more accurately recapitulate the diseased tendon niche.

276 As Bulk-RNAseq can mask the response of cell subsets, it is also necessary to explore cell  
277 type-specific responses to various sutures. Recent reports have used single-cell RNA-Seq of  
278 healthy and diseased tendon to identify 8 or more subpopulations of tendon cells, including 5  
279 distinct types of tendon-derived stromal cells<sup>37,38</sup>.

280 Endogenous tendon repair lasts longer than the 14 days of tissue culture conducted in this study  
281 and occurs within a loading environment<sup>39</sup>. However it should be noted that Rashid *et al.*  
282 examined the *in vivo* response of English Mule sheep tendon 3 months after surgical repair  
283 with a similar electrospun suture to the one described in this paper<sup>7</sup>. There was little  
284 inflammation and extensive cellular infiltration into the suture upon histological examination.

285

## 286 **Conclusions**

287 This study compared the tendon-derived stromal cell response to clinically-used PDS II and a  
288 novel twisted PDO electrospun suture. Compared to PDS II, a currently used and safe suture,  
289 electrospun sutures demonstrated greater cell attachment and tendon-derived stromal cell  
290 transcriptomic response indicative of cell proliferation and wound healing without significant

291 fibrosis. These results indicate that electrospun suture is a promising material that may improve  
292 the outcomes of surgical tendon repair.

### 293 **Acknowledgements**

294 We would like to thank the NIHR Oxford Biomedical Research Centre for funding this work.  
295 We also thank the Oxford Musculoskeletal Biobank, Louise Appleton, Debra Beazley, Kim  
296 Wheway, and Bridget Watkins for collection of human hamstring tendons. We would also like  
297 to thank Hayley Morris, Joana Martins, and Antonina Lach for their guidance and assistance  
298 in manufacture of electrospun sutures. The X-ray photoelectron (XPS) data collection was  
299 performed at the EPSRC National Facility for XPS (“HarwellXPS”), operated by Cardiff  
300 University and UCL, under Contract No. PR16195. AJC receives grant funding from the NIHR,  
301 the Wellcome Trust, the MRC/UKRI and Versus Arthritis.

### 302 **Conflict of interest**

303 The authors declare no competing interests.

304 **Figures**

Days after seeding

Electrospun suture

PDSII

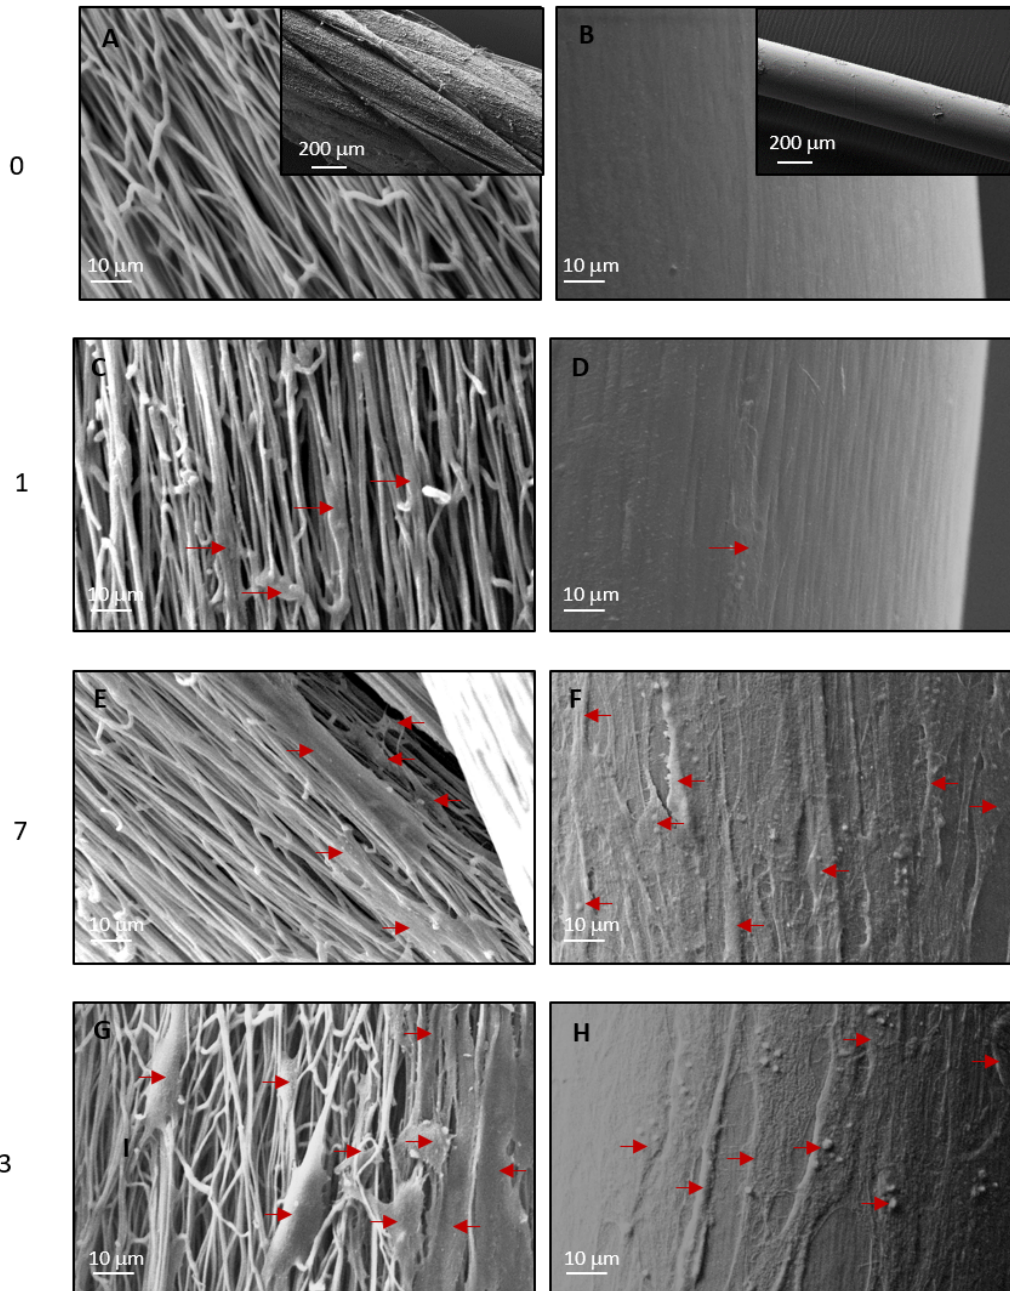

13

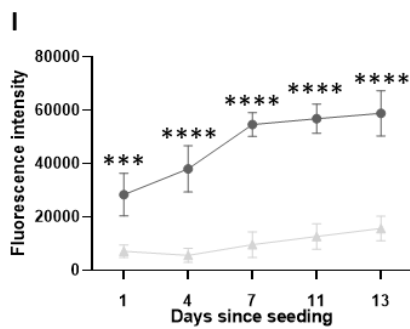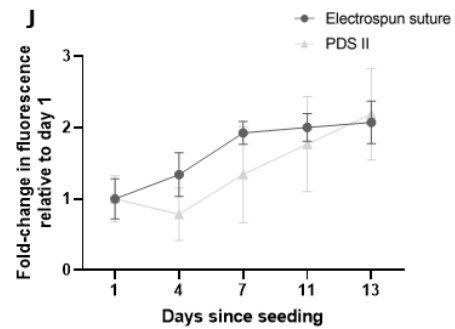

305

306 **Figure 1: Effect of suture material on cell attachment and viability after 13 days of**  
307 **healthy tendon-derived stromal cell culture.** (A-H) SEM images of suture materials at  
308 different points during cell culture with healthy human tendon-derived stromal cells  
309 (magnification 2000X). Red arrows point to attached cells. (A) Electrospun suture pre-seeding  
310 (x200 inset), and at days 1 (C), 7 (E), 13 (G) after seeding. (B) PDS II pre-seeding, and at days  
311 1 (D) (x200 inset), 7 (F), 13 (H) after seeding. (I) Fluorescence intensity, indicating the number  
312 of viable cells in the sample, plotted over a period of 13 days. There was a significantly higher  
313 fluorescence intensity from the electrospun suture compared to PDS II at each time point. (J)  
314 Fluorescence was also plotted relative to day 1 to indicate proliferation independent of initial  
315 cell attachment. No statistically significant differences were seen between electrospun suture  
316 and PDS II. (I-J) represent the average results of n=4 patient samples cultured on n=3 intra-  
317 experimental replicates of each suture. Error bars indicate standard deviation.

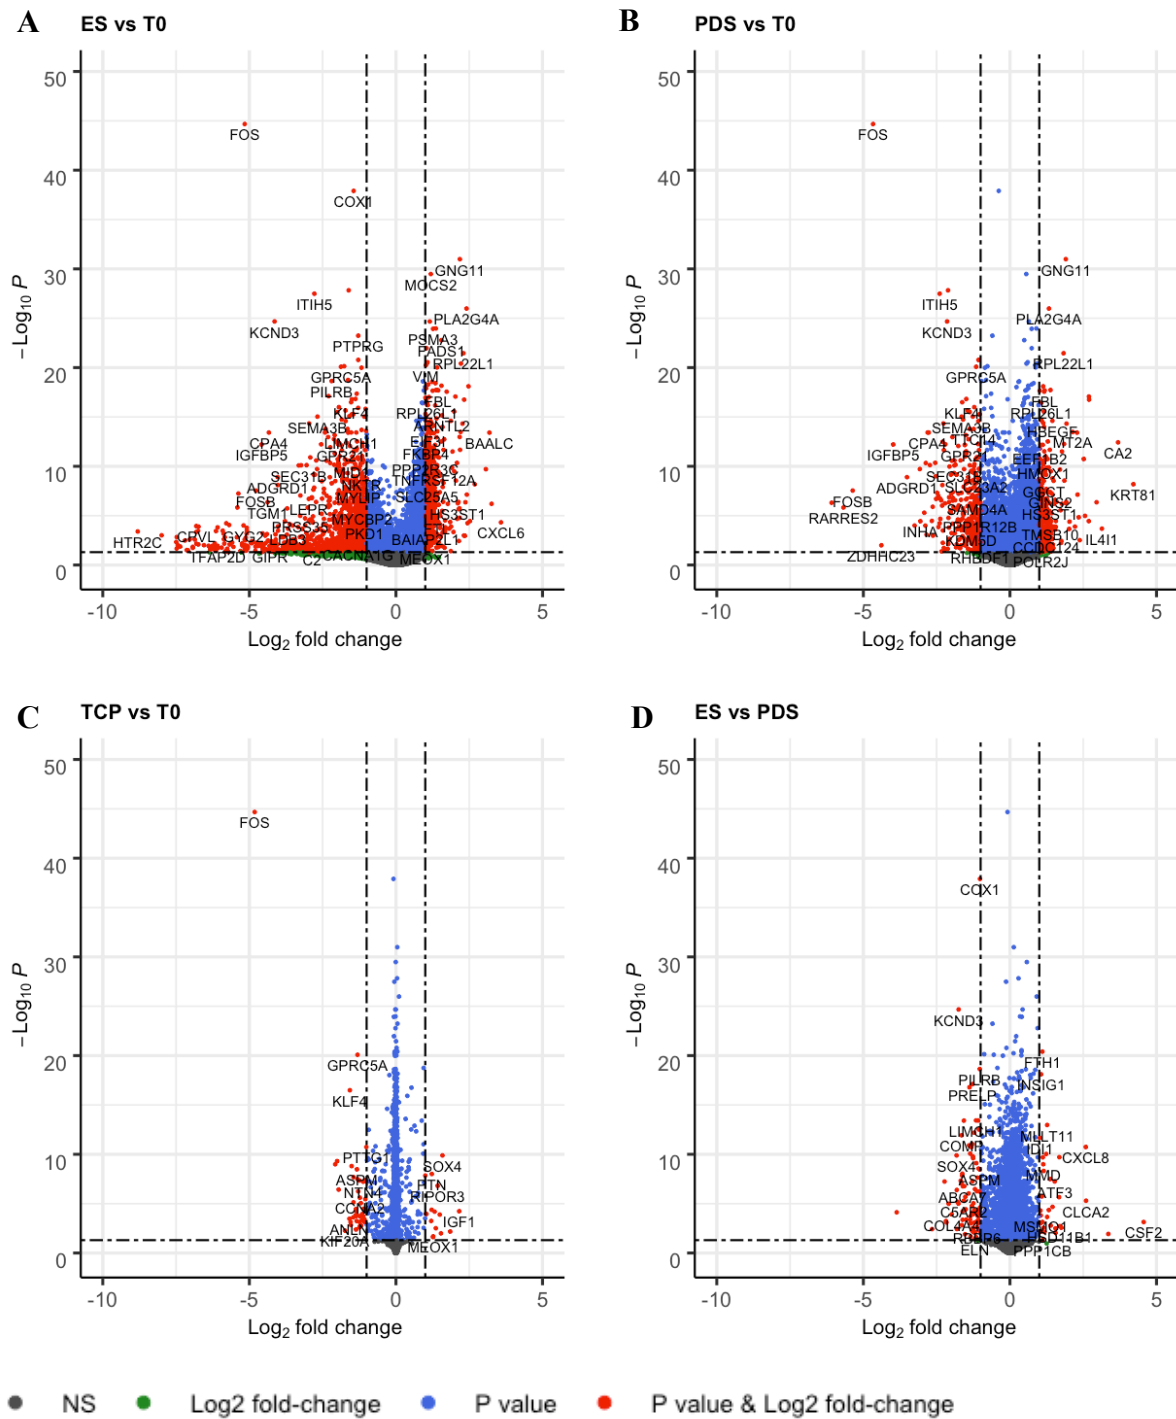

318

319

320

321

322 **Figure 2. Differentially expressed genes of tendon-derived stromal cells cultured on (A)**  
 323 **electrospun (ES) sutures, (B) PDS II sutures, or (C) tissue culture plastic control for 14**  
 324 **days compared to baseline control (T0). (D) Differentially expressed genes of cells cultured**  
 325 **on either ES or PDS II for 14 days. Genes meeting the statistical significance ( $p < 0.05$ ) and**  
 326 **have a log<sub>2</sub> fold change of at least  $\pm 1$  are shown in red,  $n = 4$  patients.**



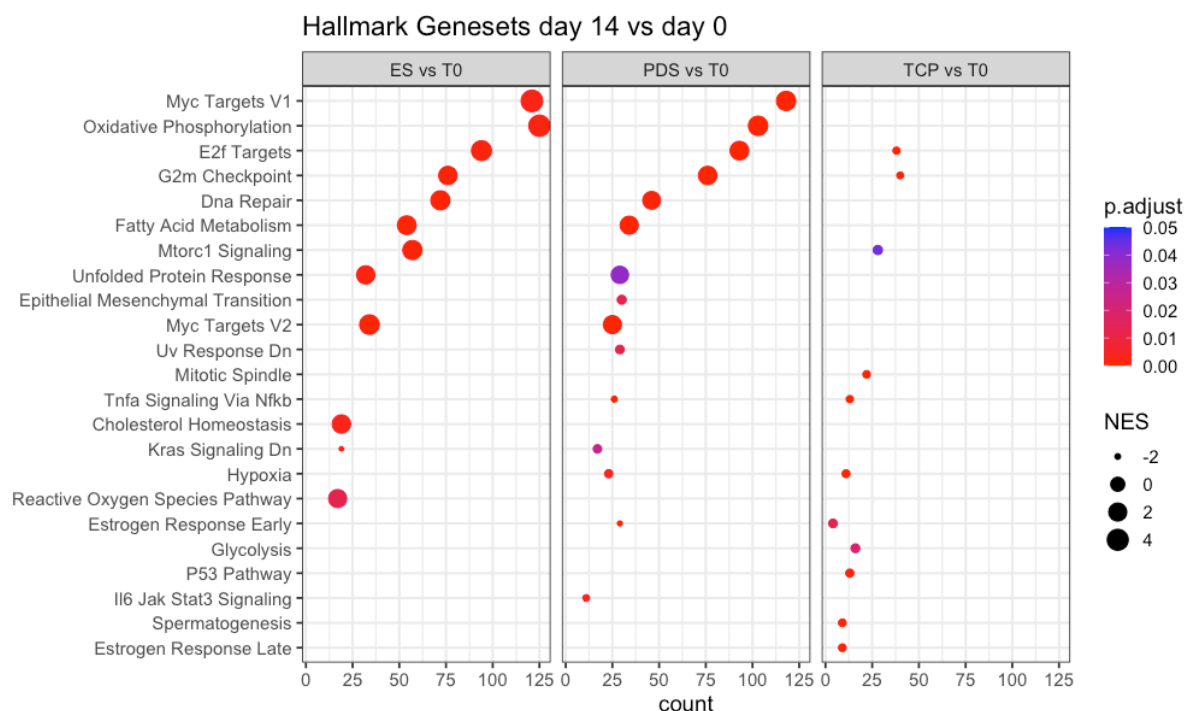

327

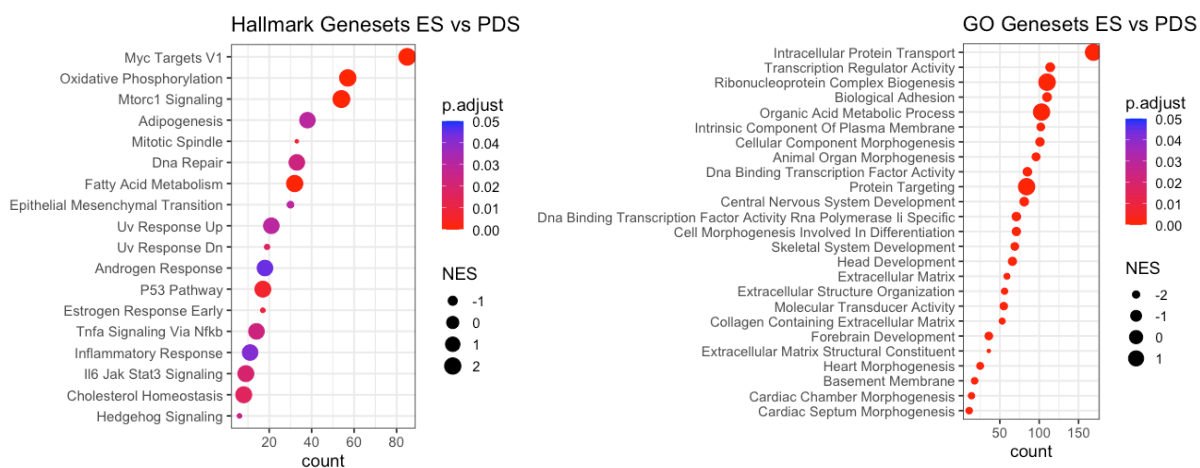

328

329 **Figure 3. Changes in Hallmark or Gene Ontology (GO) gene sets based on differentially**  
 330 **expressed genes.** Differentially expressed genes of tendon-derived stromal cells cultured on  
 331 electrospun (ES) sutures, PDS II sutures, or tissue culture plastic (TCP) control significantly  
 332 contributed to changes in well-defined biological processes. Enrichment analysis of gene  
 333 clusters after 14 days of cell culture on the materials was compared to baseline control (T0),  
 334 and gene clusters after culture on ES and PDS II were compared directly. NES = normalised  
 335 enrichment score.

336

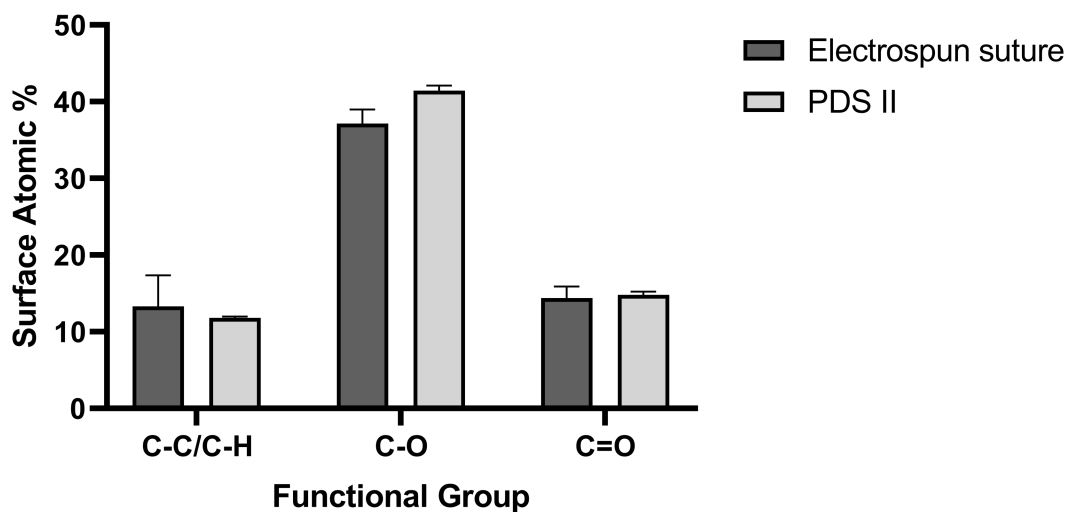

337

338

339 **Figure 4. Suture surface characterisation using X-ray Photoelectron Spectroscopy.** High-  
340 resolution carbon and oxygen XPS spectra, comparing carbon in various chemical states at the  
341 surface of the sutures (Surface Atomic %). No statistically significant differences in suture  
342 surface chemistry were observed. The figure represents the average results of n=3 points on a  
343 suture sample. Graphs show mean+SD.

344

## 345 References

346

- 347 1 Yamaguchi, K. *et al.* The demographic and morphological features of rotator cuff  
348 disease. A comparison of asymptomatic and symptomatic shoulders. *J Bone Joint Surg*  
349 *Am* **88**, 1699-1704, doi:10.2106/jbjs.E.00835 (2006).
- 350 2 Ho, J. O., Sawadkar, P. & Mudera, V. A review on the use of cell therapy in the  
351 treatment of tendon disease and injuries. *Journal of Tissue Engineering* **5**,  
352 doi:10.1177/2041731414549678 (2014).
- 353 3 Carr, A. J. *et al.* Clinical effectiveness and cost-effectiveness of open and arthroscopic  
354 rotator cuff repair [the UK Rotator Cuff Surgery (UKUFF) randomised trial]. *Health*  
355 *Technology Assessment (Winchester, England)* **19**, 1-218, doi:10.3310/hta19800  
356 (2015).
- 357 4 Hopkins, C. *et al.* Critical review on the socio-economic impact of tendinopathy. *Asia-*  
358 *Pacific Journal of Sports Medicine, Arthroscopy, Rehabilitation and Technology* **4**, 9-  
359 20, doi:10.1016/j.asmart.2016.01.002 (2016).
- 360 5 Hollister, S. J. Porous scaffold design for tissue engineering. *Nature Materials* **4**, 518-  
361 524, doi:10.1038/nmat1421 (2005).
- 362 6 Wong, J. K. F., Cerovac, S., Ferguson, M. W. J. & McGrouther, D. A. The cellular  
363 effect of a single interrupted suture on tendon. *Journal of Hand Surgery (Edinburgh,*  
364 *Scotland)* **31**, 358-367, doi:10.1016/j.jhsb.2006.03.162 (2006).
- 365 7 Rashid, M. *et al.* Histological evaluation of cellular response to a multifilament  
366 electrospun suture for tendon repair. *PLoS ONE* **15**, doi:10.1371/journal.pone.0234982  
367 (2020).
- 368 8 Lock, A. M. *et al.* Induction of immune gene expression and inflammatory mediator  
369 release by commonly used surgical suture materials: an experimental in vitro study.  
370 *Patient Safety in Surgery* **11**, doi:10.1186/s13037-017-0132-2 (2017).
- 371 9 Rothrauff, B. B. *et al.* Braided and Stacked Electrospun Nanofibrous Scaffolds for  
372 Tendon and Ligament Tissue Engineering. *Tissue Engineering. Part A* **23**, 378-389,  
373 doi:10.1089/ten.tea.2016.0319 (2017).
- 374 10 Wu, S., Wang, Y., Streubel, P. N. & Duan, B. Living nanofiber yarn-based woven  
375 biotextiles for tendon tissue engineering using cell tri-culture and mechanical  
376 stimulation. *Acta Biomater* **62**, 102-115, doi:10.1016/j.actbio.2017.08.043 (2017).
- 377 11 Kendal, A. *et al.* Resorbable electrospun polydioxanone fibres modify the behaviour of  
378 cells from both healthy and diseased human tendons. *European Cells & Materials* **33**,  
379 169-182, doi:10.22203/eCM.v033a13 (2017).
- 380 12 Beldjilali-Labro, M. *et al.* Biomaterials in Tendon and Skeletal Muscle Tissue  
381 Engineering: Current Trends and Challenges. *Materials (Basel)* **11**,  
382 doi:10.3390/ma11071116 (2018).
- 383 13 Mouthuy, P.-A., Zargar, N., Hakimi, O., Lostis, E. & Carr, A. Fabrication of continuous  
384 electrospun filaments with potential for use as medical fibres. *Biofabrication* **7**, 025006,  
385 doi:10.1088/1758-5090/7/2/025006 (2015).
- 386 14 Bosworth, L., Alam, N., Wong, J. & Downes, S. Investigation of 2D and 3D electrospun  
387 scaffolds intended for tendon repair. *Journal of Materials Science: Materials in*  
388 *Medicine* **24**, 1605-1614, doi:10.1007/s10856-013-4911-8 (2013).
- 389 15 Shang, S., Yang, F., Cheng, X., Walboomers, X. & Jansen, J. The effect of electrospun  
390 fibre alignment on the behaviour of rat periodontal ligament cells. *European Cells &*  
391 *Materials* **19**, 180-192 (2010).
- 392 16 Orr, S. B. *et al.* Aligned multilayered electrospun scaffolds for rotator cuff tendon tissue  
393 engineering. *Acta Biomaterialia* **24**, 117-126, doi:10.1016/j.actbio.2015.06.010 (2015).

- 394 17 Hakimi, O. *et al.* A layered electrospun and woven surgical scaffold to enhance  
395 endogenous tendon repair. *Acta Biomaterialia* **26**, 124-135,  
396 doi:10.1016/j.actbio.2015.08.007 (2015).
- 397 18 Smith, R. D. *et al.* The response of tenocytes to commercial scaffolds used for rotator  
398 cuff repair. *European Cells & Materials* **31**, 107-118, doi:10.22203/ecm.v031a08  
399 (2016).
- 400 19 Abhari, R. E., Mouthuy, P.-A., Zargar, N., Brown, C. & Carr, A. Effect of annealing  
401 on the mechanical properties and the degradation of electrospun polydioxanone  
402 filaments. *Journal of the Mechanical Behavior of Biomedical Materials* **67**, 127-134,  
403 doi:10.1016/j.jmbbm.2016.11.023 (2017).
- 404 20 Smith, R. *Investigating the role of scaffolds for rotator cuff repair*, University of  
405 Oxford, (2016).
- 406 21 Ewels, P., Magnusson, M., Lundin, S. & Källér, M. MultiQC: summarize analysis  
407 results for multiple tools and samples in a single report. *Bioinformatics* **32**, 3047-3048,  
408 doi:10.1093/bioinformatics/btw354 (2016).
- 409 22 Love, M. I., Huber, W. & Anders, S. Moderated estimation of fold change and  
410 dispersion for RNA-seq data with DESeq2. *Genome Biology* **15**, 550,  
411 doi:10.1186/s13059-014-0550-8 (2014).
- 412 23 Yu, G., Wang, L. G., Han, Y. & He, Q. Y. clusterProfiler: an R package for comparing  
413 biological themes among gene clusters. *Omics* **16**, 284-287,  
414 doi:10.1089/omi.2011.0118 (2012).
- 415 24 Amani, H. *et al.* Controlling Cell Behavior through the Design of Biomaterial Surfaces:  
416 A Focus on Surface Modification Techniques. *Advanced Materials Interfaces* **6**,  
417 1900572, doi:10.1002/admi.201900572 (2019).
- 418 25 Chen, M., Patra, P. K., Warner, S. B. & Bhowmick, S. Role of fiber diameter in  
419 adhesion and proliferation of NIH 3T3 fibroblast on electrospun polycaprolactone  
420 scaffolds. *Tissue Engineering* **13**, 579-587, doi:10.1089/ten.2006.0205 (2007).
- 421 26 Erisken, C., Zhang, X., Moffat, K. L., Levine, W. N. & Lu, H. H. Scaffold Fiber  
422 Diameter Regulates Human Tendon Fibroblast Growth and Differentiation. *Tissue*  
423 *Engineering. Part A* **19**, 519-528, doi:10.1089/ten.tea.2012.0072 (2013).
- 424 27 Dakin, S. G., Dudhia, J. & Smith, R. K. W. Resolving an inflammatory concept: The  
425 importance of inflammation and resolution in tendinopathy. *Veterinary Immunology*  
426 *and Immunopathology* **158**, 121-127, doi:10.1016/j.vetimm.2014.01.007 (2014).
- 427 28 Lim, J. *et al.* mTORC1 Signaling is a Critical Regulator of Postnatal Tendon  
428 Development. *Scientific Reports* **7**, 1-12, doi:10.1038/s41598-017-17384-0 (2017).
- 429 29 Sanz, L. E. *et al.* Comparison of Maxon suture with Vicryl, chromic catgut, and PDS  
430 sutures in fascial closure in rats. *Obstetrics and Gynecology* **71**, 418-422 (1988).
- 431 30 van Steensel, S. *et al.* Prevention of incisional hernia using different suture materials  
432 for closing the abdominal wall: a comparison of PDS, Vicryl and Prolene in a rat model.  
433 *Hernia: The Journal of Hernias and Abdominal Wall Surgery* **24**, 67-78,  
434 doi:10.1007/s10029-019-01941-9 (2020).
- 435 31 O'Broin, E. S., Earley, M. J., Smyth, H. & Hooper, A. C. B. Absorbable sutures in  
436 tendon repair: A comparison of PDS with prolene in rabbit tendon repair. *The Journal*  
437 *of Hand Surgery: British & European Volume* **20**, 505-508, doi:10.1016/S0266-  
438 7681(05)80164-0 (1995).
- 439 32 Stone, R. C. *et al.* Epithelial-Mesenchymal Transition in Tissue Repair and Fibrosis.  
440 *Cell and tissue research* **365**, 495-506, doi:10.1007/s00441-016-2464-0 (2016).
- 441 33 Lädermann, A., Denard, P. J. & Collin, P. Massive rotator cuff tears: definition and  
442 treatment. *International Orthopaedics* **39**, 2403-2414, doi:10.1007/s00264-015-2796-  
443 5 (2015).

- 444 34 Stolk, M. *et al.* New insights into tenocyte-immune cell interplay in an in vitro model  
445 of inflammation. *Scientific Reports* **7**, 1-14, doi:10.1038/s41598-017-09875-x (2017).
- 446 35 Oliva, N. *et al.* Regulation of dendrimer/dextran material performance by altered tissue  
447 microenvironment in inflammation and neoplasia. *Science Translational Medicine* **7**,  
448 272ra211, doi:10.1126/scitranslmed.aaa1616 (2015).
- 449 36 Ratner, B. D. Healing with medical implants: The body battles back. *Science*  
450 *Translational Medicine* **7**, 272fs274, doi:10.1126/scitranslmed.aaa5371 (2015).
- 451 37 Kendal, A. R. *et al.* Identification of human tendon cell populations in healthy and  
452 diseased tissue using combined single cell transcriptomics and proteomics. *bioRxiv*,  
453 2019.2012.2009.869933, doi:10.1101/2019.12.09.869933 (2019).
- 454 38 Jacob, B. S. *et al.* A single-cell transcriptional atlas identifies extensive heterogeneity  
455 in the cellular composition of tendons. *bioRxiv* (2019).
- 456 39 Yang, G., Rothrauff, B. B. & Tuan, R. S. Tendon and Ligament Regeneration and  
457 Repair: Clinical Relevance and Developmental Paradigm. *Birth defects research. Part*  
458 *C, Embryo today : reviews* **99**, 203-222, doi:10.1002/bdrc.21041 (2013).
- 459 40 Lach, A. A. *et al.* Pyridine as an additive to improve the deposition of continuous  
460 electrospun filaments. *PLoS One* **14**, e0214419, doi:10.1371/journal.pone.0214419  
461 (2019).
- 462 41 Yao, L., Bestwick, C. S., Bestwick, L. A., Maffulli, N. & Aspden, R. M. Phenotypic  
463 drift in human tenocyte culture. *Tissue Engineering* **12**, 1843-1849,  
464 doi:10.1089/ten.2006.12.1843 (2006).
- 465 42 Zhu, A., Ibrahim, J. G. & Love, M. I. Heavy-tailed prior distributions for sequence  
466 count data: removing the noise and preserving large differences. *Bioinformatics*  
467 (*Oxford, England*) **35**, 2084-2092, doi:10.1093/bioinformatics/bty895 (2019).
- 468 43 Blighe, K., Rana, S. & Lewis, M. (GitHub repository, 2019).
- 469 44 Sergushichev, A. A. An algorithm for fast preranked gene set enrichment analysis using  
470 cumulative statistic calculation. *bioRxiv*, doi:10.1101/060012 (2016).
- 471 45 Liberzon, A. *et al.* The Molecular Signatures Database Hallmark Gene Set Collection.  
472 *Cell Systems* **1**, 417-425, doi:10.1016/j.cels.2015.12.004 (2015).
- 473 46 Subramanian, A. *et al.* Gene set enrichment analysis: A knowledge-based approach for  
474 interpreting genome-wide expression profiles. *Proceedings of the National Academy of*  
475 *Sciences* **102**, 15545-15550 (2005).
- 476
